1 Antibiotic resistome and microbial community structure during anaerobic co-digestion of  
2 food waste, paper and cardboard

3

4 Kärt Kanger,<sup>a</sup> Nigel G.H. Guilford,<sup>b</sup> HyunWoo Lee,<sup>b</sup> Camilla L. Nesbø,<sup>b,c</sup> Jaak Truu,<sup>a</sup>

5 Elizabeth A. Edwards<sup>b#</sup>

6

7 <sup>a</sup>Faculty of Science and Technology, University of Tartu, Tartu, Estonia

8 <sup>b</sup>BioZone Centre for Applied Biosciences and Bioengineering, University of Toronto,

9 Toronto, ON, Canada

10 <sup>c</sup>Department of Biological Sciences, University of Alberta, Edmonton, AB, Canada

11

12 Running Head: Anaerobic digester resistome and microbial community

13

14 #Address correspondence to Elizabeth A. Edwards, [elizabeth.edwards@utoronto.ca](mailto:elizabeth.edwards@utoronto.ca).

15

16 ABSTRACT

17 Antimicrobial resistance is a globally recognized public health risk. High incidence of  
18 antibiotic resistant bacteria and antibiotic resistance genes (ARGs) in solid organic waste  
19 necessitates the development of effective treatment strategies. The objective of this study  
20 was to assess ARG diversity and abundance as well as the relationship between resistome  
21 and microbial community structure during anaerobic co-digestion (AD) of food waste,  
22 paper and cardboard. A lab-scale solid-state AD system consisting of six sequentially fed  
23 leach beds (each with a solids retention time of 42 days) and an upflow anaerobic sludge  
24 blanket (UASB) reactor was operated under mesophilic conditions continuously for 88  
25 weeks to successfully treat municipal organic waste and produce biogas. A total of ten  
26 samples from digester feed and digestion products were collected for microbial  
27 community analysis including SSU rRNA gene sequencing, total community  
28 metagenome sequencing and quantitative PCR. Taxonomic analyses revealed that AD  
29 changed the taxonomic profile of the microbial community: digester feed was dominated  
30 by bacterial and eukaryotic taxa while anaerobic digestate possessed a large proportion of  
31 archaea mainly belonging to the methanogenic genus *Methanosaeta*. ARGs were  
32 identified in all samples with significantly higher richness and relative abundance per 16S  
33 rRNA gene in digester feed compared to digestion products. Multidrug resistance was the  
34 most abundant ARG type. AD was not able to completely remove ARGs as shown by  
35 ARGs detected in digestion products. Using metagenomic assembly and binning we  
36 detected potential bacterial hosts of ARGs in digester feed, that included *Erwinia*,  
37 *Bifidobacteriaceae*, *Lactococcus lactis* and *Lactobacillus*.

38

39    IMPORTANCE

40    Solid organic waste is a significant source of antibiotic resistance genes (ARGs) (1) and  
41    effective treatment strategies are urgently required to limit the spread of antimicrobial  
42    resistance. Here we studied the antibiotic resistome and microbial community structure  
43    within an anaerobic digester treating a mixture of food waste, paper and cardboard. We  
44    observed a significant shift in microbial community composition and a reduction in ARG  
45    diversity and abundance after 6 weeks of digestion. We identified the host organisms of  
46    some of the ARGs including potentially pathogenic as well as non-pathogenic bacteria,  
47    and we detected mobile genetic elements required for horizontal gene transfer. Our  
48    results indicate that the process of sequential solid-state anaerobic digestion of food  
49    waste, paper and cardboard tested herein provides a significant reduction in the relative  
50    abundance of ARGs per 16S rRNA gene.

51

## 52 INTRODUCTION

53 Antimicrobial resistance (AMR) is a widely recognized public health risk. The extensive  
54 use of antimicrobial compounds since World War II has triggered the rapid spread and  
55 evolution of AMR mechanisms to such an extent that AMR is considered one of today's  
56 top medical concerns globally (2). Currently, 700 000 deaths are attributed to resistant  
57 microbial infections annually, which is projected to increase to 10 million deaths by 2050  
58 resulting in the loss of 100 trillion USD of economic output (3). In light of this gloomy  
59 prospect, a One-Health approach has been proposed to tackle AMR by recognizing the  
60 connections between human and animal health and the environment (4).

61 Although the vast majority of antimicrobial research is focusing on the clinical  
62 setting, the natural environment has gained attention as a possible reservoir and dispersal  
63 route of antimicrobial resistance determinants, including antibiotic resistant bacteria and  
64 antibiotic resistance genes (ARGs) (5, 6). Various natural ecosystems, such as ancient  
65 permafrost sediments (7), pristine soil (8, 9), oceanic (10) and freshwater bodies (11)  
66 have been shown to possess a diversity of ARGs collectively defined as the resistome.  
67 However, higher concentrations of resistance determinants have been observed in  
68 environments with anthropogenic impact where selective pressure for ARGs is present,  
69 such as wastewater treatment plants, animal husbandry facilities, aquaculture farms and  
70 pharmaceutical manufacturing (12).

71 Various types of solid organic waste may also serve as potential sources of  
72 antibiotic resistant bacteria and ARGs (1). In addition to the extensively studied  
73 resistomes of sewage sludge and animal manure, the organic fraction of municipal solid  
74 waste (MSW) may also contribute to the dissemination of AMR. Global production of

75 MSW is estimated at around 2 billion tons per year, of which 34–53% is organic  
76 biodegradable waste including food waste as the primary component (13). Paper waste  
77 forms 17% of MSW globally, including different lignocellulosic fibres such as cardboard,  
78 newspaper, magazines, wrapping paper, shredded paper, boxes, bags and beverage cups  
79 (14).

80 Several studies have highlighted the role of the food chain in AMR as a direct link  
81 to human health (15, 16) and identified antibiotic resistant pathogens in various food  
82 products such as meat (17–19), fruit and vegetables (20–23), poultry (24, 25), fish (26,  
83 27) and dairy (28). Therefore, it is reasonable to assume that ARGs are also present in  
84 food waste: Lee *et al.* (29) detected a variety of ARGs in the wastewater from food waste  
85 recycling in Korea, although the abundance of ARGs remained below that of manure and  
86 sewage sludge.

87 To mitigate the harmful environmental impacts of organic solid waste, anaerobic  
88 digestion (AD) is widely implemented as a treatment strategy, providing waste  
89 stabilization as well as the production of renewable energy (30). AD changes the  
90 structure of the microbial community of the substrates which in turn affects the resistome  
91 present in digestion products. Although it is generally accepted that ARG abundance is  
92 reduced overall during AD, enrichment of some ARGs and rebound-effects have been  
93 reported in several studies (summarized by Youngquist *et al.* (31)). For example, Pu *et al.*  
94 (32) studied the impact of applying pig manure to fields and found that AD reduced the  
95 relative abundance of Macrolide-Lincosamide-Streptogramin (MLS) and tetracycline  
96 resistance genes, while resistance genes for sulfa, aminoglycoside, florfenicol,  
97 amphenicol and chloramphenicol were enriched. Similarly, the effect of aerobic

98 composting of organic waste remains contradictory: while some evidence suggests  
99 composting can reduce the abundance of antibiotic resistant bacteria and ARGs, other  
100 studies have shown increased abundance and diversity of ARGs (31).

101         Recently, there has been growing interest in AD of food waste due to its high  
102 energetic value (13). However, limited information is available on the effect of AD on the  
103 microbial community and resistome in food waste. Zhang *et al.* (33) identified 11 ARGs  
104 and class 1 integron integrase gene *intI1* in digested food waste: while *tetA*, *tetB*, *tetX*,  
105 *sul1*, *cmlA*, *floR* and *intI1* were significantly reduced by AD, enrichment of *tetM*, *tetW*,  
106 *tetQ* and *tetO* was recorded. Similarly, another study detected both increase and reduction  
107 of specific ARGs in the co-digestion of sewage sludge and food waste following  
108 microwave pretreatment (34). Thus, the effect of AD on the food waste resistome and the  
109 associated microbial community is still unclear.

110         In addition to quantification of individual ARGs, detecting potential host  
111 organisms of these genes is important to evaluate the risk to human health. Several  
112 studies have used correlation and network analysis to detect relationships between  
113 individual ARGs and bacterial genera (34–37). High mobility of ARGs due to horizontal  
114 gene transfer (HGT) is responsible for the spread of AMR between different bacteria  
115 including human pathogens as well as non-pathogenic environmental bacteria which  
116 often serve as reservoirs of ARGs (38).

117         The objective of this study was to measure ARG abundance and resistome  
118 diversity before and after anaerobic co-digestion of food waste, paper and cardboard.  
119 Samples were collected from a lab-scale solid-state AD system that exhibited stable  
120 methane production and substrate destruction rates (39, 40). By simultaneously analyzing

121 microbial community shifts, we attempted to assign ARGs to specific host organisms.  
122 Using SSU rRNA gene sequencing, total community metagenome sequencing and  
123 targeted quantitative PCR we were able to quantify changes in the diversity and size of  
124 the resistome before and after digestion together with changes in the taxonomic profile of  
125 the microbial community. We were further able to identify potential host organisms of  
126 ARGs by using metagenomic assembly and binning methods.

127

## 128 RESULTS

129 A total of 10 samples were collected from a lab-scale solid-state anaerobic digestion  
130 system described in detail by a recent PhD thesis (39). The ten samples included three  
131 samples of raw food waste (FW1, FW2, FW3) collected from local residential green bin  
132 program, three samples of the mixture of food waste and lignocellulosic fibres that  
133 constituted the leach bed feed (LBF1, LBF2, LBF3), three samples of 6 week old  
134 digestate (DG74, DG76, DG78) and one sample of the microbial granules from the  
135 upflow anaerobic sludge blanket reactor (UASB) treating leachate from the leach beds.  
136 DNA was extracted from each sample in order to analyze the microbial community  
137 composition and ARGs diversity, abundance, genomic location and host organisms using  
138 a multi-pronged approach combining metagenome sequence analyses, taxonomic  
139 profiling and quantitative PCR (Fig. 1).

140 **Microbial community.** Microbial community structure was analyzed by small  
141 subunit (SSU) rRNA gene-fragment sequencing (method 2 in Fig. 1) capturing bacterial,  
142 archaeal and eukaryotic diversity (Tables S1 and S2 in supplemental material). A clear  
143 distinction in the communities of digester feed and digestion products was detected: food

144 waste and leach bed feed microbial communities were dominated by bacterial and  
145 eukaryotic taxa while anaerobic digestate and microbial community of granules from the  
146 UASB reactor possessed a large proportion of archaeal phylotypes mainly belonging to  
147 the methanogenic genus *Methanosaeta* (Fig. 2). The most abundant bacterial OTUs in  
148 digester feed belonged to the family *Enterobacteriaceae*, including the genera  
149 *Citrobacter*, *Enterobacter*, *Erwinia*, *Kluyvera*, *Pantoea*, *Serratia* and *Lelliottia*.  
150 Additionally, representatives of the phylum *Firmicutes* were detected in FW2, including  
151 the genera *Lactobacillus* and *Leuconostoc*, probably indicating fermentation processes  
152 occurring in the respective food waste. In addition to bacterial sequences, fungal and  
153 plant material was detected in digester feed (FW, LBF), but not in digestion products  
154 (DG) or the UASB. Across all samples, 36–62% of OTUs were detected at low relative  
155 abundances comprising less than 1% of the total community. A comparison of genus  
156 level taxonomic composition detected from SSU rRNA gene amplicon sequence analysis  
157 using QIIME (tool 2.1 in Fig. 1) to that derived from total community metagenome  
158 sequencing analysis using Kaiju (tool 3.3 in Fig. 1) or metaxa2 (tool 3.4 in Fig. 1)  
159 showed relatively good agreement between the three different annotation tools used in  
160 this study (Fig. S1 in supplemental material).

161 **ARG diversity and abundance.** Total community metagenome sequencing data  
162 from seven samples (Table S3 in supplemental material) was analyzed using the ARGs  
163 Online Analysis Pipeline (ARGs-OAP) (41) (tool 3.5 in Fig. 1) to characterize the  
164 distribution and diversity of ARGs before and after anaerobic digestion. The richness of  
165 ARGs, measured as the number of distinct ARGs identified in one sample type, was  
166 highest in digester feed with 330 and 336 different ARGs detected in FW and LBF



167 samples, respectively. The richness of ARGs in digestion products remained two times  
168 lower with 115 different ARGs detected in DG and UASB samples indicating reduced  
169 diversity of ARGs after anaerobic digestion. Twenty three ARGs were found to be unique  
170 to digestion products belonging to aminoglycoside (*aac(3)-I*, *ant(9)-I*), beta-lactam  
171 (*OXA-10*, *OXA-205*, *OXA-251*, *OXA-34*, *OXA-46*, *OXA-75*), chloramphenicol (*catQ*),  
172 MLS (*ereB*, *lnuB*, *mphA*, *carA*), sulfonamide (*sul3*), tetracycline (*tet44*, *tetT*),  
173 trimethoprim (*dfrA5*) and vancomycin (*vanA*, *vanG*, *vanH*, *vanN*, *vanU*, *vanX*) type.

174 In addition to richness, the relative abundance of ARGs per 16S rRNA gene was  
175 determined from total community metagenome sequencing data (Table S4 in  
176 supplemental material). Relative abundances of ARGs per 16S rRNA gene were  
177 significantly higher in digester feed than in digestion products, indicating the ability of  
178 anaerobic digestion to reduce ARGs (Fig. 3). Total relative abundances of ARGs per 16S  
179 rRNA gene in food waste samples FW1 (0.78 ARG/16S rRNA) and FW2 (0.40 ARG/16S  
180 rRNA) were similar to the respective values in the mixtures of food waste with  
181 lignocellulosic fibres (LBF1 0.84 ARG/16S rRNA, LBF2 0.44 ARG/16S rRNA),  
182 indicating the role of food waste as the primary source of ARGs in leach bed feed. Most  
183 of the ARGs identified in digester feed conferred multidrug resistance (Fig. 3A).  
184 Additionally, many potential ARGs with unclassified resistance type were detected. The  
185 highest relative abundance value for an individual gene (Fig. 3B) was recorded for  
186 AcrAB-TolC multidrug efflux complex subunit *acrB* reaching 0.05 copies/16S rRNA  
187 gene in samples FW1 and LBF1. Other highly abundant genes in digester feed included  
188 subunits of multidrug resistance complexes (*acrA*, *mdtB*, *mdtC*, *tolC*), several regulatory  
189 protein genes associated with AMR (*cpxR*, *arlR*) and bacitracin resistance gene *bacA*.

190 Relative abundances of individual ARGs in digestion products remained below 0.01  
191 copies/16S rRNA in all cases. Similarly to digester feed, the highest value for an  
192 individual gene in digestion products was recorded for *acrB* with 0.007 copies/16S rRNA  
193 in UASB.

194 A high-throughput qPCR (HT-qPCR) array was also used as an alternative  
195 approach to quantify 315 ARGs (tool 4.1 in Fig. 1) and 57 mobile genetic elements  
196 (MGEs) (tool 4.2 in Fig.1) in food waste and digestate DNA samples (Table S5 in  
197 supplemental material). In agreement with the results from the metagenomic data, the  
198 diversity of ARGs and MGEs was higher in food waste with 161 different genes detected,  
199 while only 32 different genes were detected in digestate (Fig. 4). Among these, 10 ARGs  
200 were found only in digestate samples and not in food waste. Notably, MLS resistance  
201 genes *mphA* and *lnuB*, phenicol resistance gene *catQ* and tetracycline resistance gene  
202 *tet44* were found to be unique to digestate by both methods.

203 Although the richness of ARGs and MGEs was higher in food waste samples,  
204 absolute abundances of individual genes normalized per sample dry weight reached  
205 higher levels in digestates (Fig. 4) according to HT-qPCR array results calculated based  
206 on abundance of 16S rRNA gene per gram of dry sample (tool 1.1 in Fig. 1, Fig. S2 in  
207 supplemental material). Most prevalent ARG types in final digestates (Fig. 4B) included  
208 MLS (genes *ere(A)*, *erm(F)*, *erm(O)*, *lnu(F)*, *lnuB*, *mef(B)*, *mphA*), aminoglycoside  
209 (genes *aac3-Via*, *aadE*, *aph4ib*) and tetracycline (genes *tet44*, *tetD*, *tetM*, *tetW*) with  
210 absolute abundances of individual genes ranging between  $10^7$  and  $10^8$  copies/g-dw.  
211 Absolute abundances of ARGs in food waste samples ranged between  $10^4$  and  $10^7$   
212 copies/g-dw. MGEs followed a similar pattern to ARGs with more genes detected in food

213 waste but higher absolute abundances of individual genes per gram of sample dry weight  
214 detected in digestates (Fig. 4C).

215 **Genomic context of ARGs.** In order to study the genomic context of ARGs, total  
216 community metagenome sequencing reads were assembled into longer contigs using  
217 MEGAHIT (tool 3.6 in Fig. 1) and metaSPAdes (tool 3.7 in Fig. 1) assemblers (Table S6  
218 in supplemental material), followed by detection of ARGs on contigs (tool 3.10 in Fig. 1)  
219 and identification of plasmid sequences carrying ARGs (tool 3.8 in Fig. 1) (Table S7 in  
220 supplemental material).

221 On average, 0.10% of all assembled contigs carried ARGs in digester feed, while  
222 only 0.003% of contigs identified in digestion products included ARGs (Table S8 in  
223 supplemental material). More than 90% of ARG-carrying contigs in all samples included  
224 only one ARG, however, contigs with multiple ARGs were also observed with up to five  
225 ARGs per contig (Table S8 in supplemental material) detected in digester feed. Contigs  
226 with multiple ARGs typically carried subunits of multidrug efflux systems such as  
227 MdtABC-TolC coupled with two-component regulatory systems for efflux proteins (such  
228 as BaeSR).

229 Identification of plasmids from ARG-carrying contigs revealed that on average  
230 32% of ARGs detected in digestion substrates were located on plasmids (Table 1)  
231 indicating their potential for HGT. The distribution of plasmid ARGs resembled the  
232 pattern of ARGs identified from short sequencing reads with multidrug resistance genes  
233 being the most abundant type in digestion substrates (Fig. S3 in supplemental material).  
234 Proportion of plasmid ARGs in digestion products varied between 33.3% and 60.0%,  
235 although the number of detected ARGs remained low (11 ARGs on plasmids in DG74,

236 24 ARGs in DG78, and 20 ARGs in UASB, respectively; Table 1). ARGs identified as  
237 chromosomal accounted for 8.3 to 28.9% of ARGs across all samples, remaining below  
238 the respective values for plasmid ARGs in all cases (Table 1).

239 **Bacterial hosts of ARGs.** MEGAHIT-assembled contigs that were not identified  
240 as plasmids were further annotated for their taxonomic affiliation (tool 3.9 in Fig. 1).  
241 Figure 5 depicts the frequency of specific host-ARG pairs identified for most abundant  
242 bacterial genera in digester feed. Gammaproteobacterial genera *Stenotrophomonas* and  
243 *Acinetobacter* clustered separately and were characterized by species-specific multidrug  
244 resistance efflux complexes and the corresponding regulatory systems.  
245 *Stenotrophomonas* carried subunits for SmeABC and SmeDEF efflux pumps as well as  
246 the SmeRS regulatory system formerly identified in *S. maltophilia* (42, 43).  
247 *Acinetobacter* carried subunits for AdeIJK and AdeFGH multidrug efflux pumps together  
248 with multidrug resistance genes *adeB*, *abeM*, transcriptional activator *mexT* and  
249 aminoglycoside resistance gene *APH(3')-Ia*. In addition to *Stenotrophomonas* and  
250 *Acinetobacter*, other identified ARG host genera in the digester feed included  
251 *Pseudomonas*, *Enterobacter*, *Klebsiella*, *Raoultella*, *Rahnella*, *Rouxiella*, *Pantoea*,  
252 *Serratia*, *Erwinia*, *Citrobacter*, *Leclercia* and *Lelliottia* that formed a network by sharing  
253 connections with ARGs belonging mainly to multidrug resistance type. For example,  
254 *Pseudomonas* was characterized by the highest number of ARG connections carrying  
255 subunits of the MexEF-OprN efflux system; similarly, *Enterobacter* and *Klebsiella*  
256 shared connections to subunits of MdtABC-TolC and AcrAB-TolC efflux systems. In  
257 addition to multidrug resistance genes, genes conferring resistance to polymyxin were  
258 related to multiple host genera in digester feed: *rosA* and *rosB* were both found in

259 *Serratia*, *Rahnella* and *Rouxiella*, *arnA* was found in *Citrobacter* and *Pseudomonas*,  
260 *pmrE* in *Enterobacter* and *Klebsiella*, and *pmrA* in *Raoultella*.

261 Only a limited number of ARGs were detected and their host organisms  
262 taxonomically determined in digestion products (Table 2). Bacterial hosts of ARGs in  
263 digestion products included genera formerly identified in anaerobic digesters associated  
264 with microbial degradation processes, such as *Fermentimonas*, and several sulphate-  
265 reducing genera (*Desulfobacca*, *Desulfococcus*). More importantly, *Burkholderia* and  
266 *Arcobacter* (both carrying isoniazid resistance gene *katG*), *Streptococcus* (carrying MLS  
267 resistance gene *mefA*) and *Escherichia* (carrying MLS resistance gene *mefB*) were  
268 identified as ARG host organisms of clinical relevance.

269 To further investigate the potential hosts of ARGs, the assembled contigs were  
270 binned into 201 metagenome assembled genomes (MAGs) (tools 3.11, 3.12 and 3.13 in  
271 Fig. 1) with >75% completeness and <25% redundancy (Table S9, Fig. S4 in  
272 supplemental material). Notably, MAGs found in digestion products (DG74, DG78,  
273 UASB) accounted for 75% of all assembled MAGs and did not contain ARGs. On the  
274 contrary, four MAGs containing ARGs were identified in digester feed (FW1, FW2,  
275 LBF1, LBF2) (Table 3). Interestingly, a genome belonging to the plant pathogenic genus  
276 *Erwinia* carried 19 ARGs conferring resistance to aminoglycoside, bacitracin, polymyxin,  
277 quinolone and sulfonamide antibiotics while also harboring several genes for multidrug  
278 resistance. Lactic acid bacteria *Lactococcus lactis* and *Lactobacillus* that are generally  
279 associated with probiotic features displayed resistance for MLS (*Lactococcus lactis* genes  
280 *lmrC*, *lmrD*, *lmrP*), tetracycline (*Lactococcus lactis* genes *tetM*, *tetS*) and trimethoprim  
281 (*Lactobacillus* gene *dfrE*). Additionally, a MAG belonging to the family

282 *Bifidobacteriaceae* carried the inner membrane transporter gene *mdsB* of multidrug and  
283 metal efflux complex MdsABC. The four ARG-containing MAGs that were highly  
284 abundant in digester feed were not identified in digestion products (Fig. S4 in  
285 supplemental material).

286

## 287 DISCUSSION

288 AD is widely used for treatment of solid organic waste providing waste stabilization as  
289 well as energy (biogas) production. More recently, the potential of AD to reduce  
290 antibiotic resistant bacteria and ARGs has been investigated with mixed results (31). In  
291 this study, we examined the effect of co-digestion of food waste, paper and cardboard on  
292 microbial community composition and resistome using SSU rRNA gene sequencing, total  
293 community metagenome sequencing and quantitative PCR. The studied AD system that  
294 was a lab-scale solid-state leach bed reactor with leachate recycle via a UASB reactor  
295 that has been thoroughly described elsewhere (40). This AD system performed very well  
296 over 1.5 years of operation, also maintaining a stable microbial community (44).

### 297 **Microbial community composition of digester feed and digestion products.**

298 Microbial community composition has been suggested as one of the main drivers of  
299 ARGs in anaerobic digesters (35, 45). The microbial communities of the digester feed – a  
300 mix of food waste and lignocellulosic fibres – revealed aerobes and facultative aerobes  
301 that were distinct from the strictly anaerobic bacteria and archaea inside the digester. The  
302 FW alone and the blended LBF samples had very similar taxonomic profiles indicating  
303 that food waste was the main contributor to the microbial community in the digester feed,

304 consisting mainly of microorganisms native to food products or of the microbes that  
305 colonized food waste during collection and storage prior to AD.

306 Previous studies on food microbiomes have highlighted the role of fermentative  
307 organisms such as lactic acid bacteria in fermentation processes (46). Several OTUs  
308 belonging to the genera *Lactobacillus* and *Leuconostoc* were identified in the food waste  
309 used in this study, indicating the presence of fermented food products (e.g. cheese,  
310 sourdough) or the start of degradation processes during the collection, storage and pre-  
311 processing of food waste prior to AD. *Lactobacillus* and *Leuconostoc* may also indicate  
312 spoilage of meat as previously shown for vacuum-packed pork (47), beef (48–50),  
313 minced meat (51) and sausages (52, 53). Besides lactic acid bacteria, several genera from  
314 the family *Enterobacteriaceae* were detected in digester feed, including *Citrobacter*,  
315 *Enterobacter*, *Erwinia*, *Kluyvera*, *Pantoea*, *Serratia* and *Lelliottia*. Jackson *et al.* (54)  
316 identified *Serratia*, *Erwinia*, *Enterobacter* and *Pantoea* from leafy salad vegetables,  
317 which are also common in food waste. While many of the identified *Enterobacteriaceae*  
318 are widely recognized as plant pathogens or symbionts (e.g. *Erwinia*), potential human  
319 pathogens were also detected (e.g. *Enterobacter*, *Serratia*).

320 Special attention should be given to the occurrence of ESKAPE pathogens -  
321 *Enterococcus faecium*, *Staphylococcus aureus*, *Klebsiella pneumoniae*, *Acinetobacter*  
322 *baumannii*, *Pseudomonas aeruginosa*, and *Enterobacter* species, that are common causes  
323 of nosocomial infections and characterized by various antimicrobial resistance  
324 mechanisms (55). A total of 15 OTUs annotated to *S. aureus*, *K. pneumoniae*, *A.*  
325 *baumannii* or *P. aeruginosa* were found in very low abundance in digester feed (each  
326 with relative abundance below 0.12% of total OTUs), while none of these were detected

327 in digestion products. One hundred and two (102) OTUs were annotated to *Enterobacter*  
328 comprising up to 0.13% of OTUs in digester feed, while none was detected in digestion  
329 products. Thus, ESKAPE pathogens were detectable in relatively low abundance in the  
330 digester feed used in this study but did not survive anaerobic treatment.

331 The microbial community after AD was completely different from that in the  
332 feed. Hydrolytic, fermenting, acidogenic, acetogenic and methanogenic microorganisms  
333 comprise a typical microbial community in a stable AD process. Representatives from the  
334 phyla *Actinobacteria*, *Bacteroidetes*, *Chloroflexi*, *Firmicutes* and *Proteobacteria* that  
335 have been connected to hydrolysis, fermentation and acidogenesis (56) were identified in  
336 the bacterial communities of the digestate samples in this study. As expected, digestates  
337 exhibited abundant archaeal communities responsible for methane production.

338 Acetoclastic methanogen *Methanosaeta* was identified as the dominant archaeal genus  
339 (reaching up to 72.6% of total archaeal OTUs in DG74), which has been noted before for  
340 digesters with high acetate concentration (57, 58). Members of the orders  
341 *Methanobacteriales* and *Methanomicrobiales* commonly identified in anaerobic digesters  
342 treating food waste (59–61) were also present in the digestates of the current study. Thus,  
343 a diverse methanogenic community achieved stable methane production, as evidenced by  
344 substantial feedstock degradation and biogas production rates (40).

345 **ARGs in digester feed and digestion products.** ARGs were identified in all  
346 samples, in digester feed as well as in AD products. Higher richness as well as higher  
347 relative abundance of individual ARGs per 16S rRNA gene was found in digester feed  
348 compared to digestion products indicating the ability of AD to reduce ARG diversity and  
349 abundance. Total relative abundance of ARGs per 16S rRNA gene reached 0.84



350 ARG/16S rRNA gene in digester feed (LBF1), which is comparable to ARG levels in  
351 faeces and wastewater from livestock farms (36), while the respective value in digestion  
352 products was below 0.05 ARG/16S rRNA (0.04 ARG/16S rRNA in UASB), comparable  
353 to natural environments such as soils, sediments and river water (36). Thus, AD clearly  
354 reduced ARG values from levels associated with high contamination to environmental  
355 background levels.

356 Yet, although AD significantly reduced the abundance of ARGs, a limited number  
357 of ARGs were also detected in digestion products. Total community metagenome  
358 sequencing and HT-qPCR array both detected ARGs in digestion products that were low  
359 in abundance relative to the total microbial population (as shown by total community  
360 metagenome sequencing), but achieved high absolute abundance per gram dry mass of  
361 digestate (reaching  $10^8$  copies/g-dw for individual genes and  $10^9$  copies/g-dw in total)  
362 due to high bacterial loads in the digestates (as shown by HT-qPCR array). Same order of  
363 magnitude absolute abundance values of individual ARGs detected by qPCR have also  
364 been reported previously for anaerobic digestates of FW (62). Thus, the effectiveness of  
365 AD on treating waste containing ARGs is a function of which microbes can grow in the  
366 AD system. In this case study, ARGs from food waste microbes were eliminated while  
367 ARGs present in the microbes involved in the digestion process were more abundant in  
368 the final digestate, and were at high absolute abundance owing to the high concentration  
369 of microbes generally after digestion. Future experiments should focus on post-treatment  
370 of digested solids, such as additional aerobic curing to reduce odor and stabilize waste, to  
371 determine the ultimate environmental load of ARGs associated with land application of  
372 anaerobic digestates.

373 Special attention should be given to the mobility of ARGs that can be transferred  
374 from environmental bacteria to human pathogens or vice versa as shown previously (63).  
375 In this study, on average, 32% of ARGs in assembled contigs from digester feed were  
376 located on plasmids, indicating their potential mobility. Similar plasmid proportions from  
377 total assembled contigs have also been found in photobioreactor microbial communities  
378 (64) and microbial mats inhabiting mine waters (65). The HT-qPCR array detected a  
379 wide array of MGEs including insertional sequences, integrases, transposases and  
380 plasmids mostly in food waste but also in digestates. Class 1 integron-integrase gene *intI1*  
381 has been suggested as a proxy for anthropogenic pollution (66) and was also found in  
382 digester feed (in the range of  $10^5$ – $10^6$  copies/g-dw) as well as in digestion products ( $10^8$   
383 copies/g-dw) of this study. The occurrence of *intI1* in digestion products correlates with  
384 the limited number of ARGs detected in the digestates of this study, showing that  
385 anthropogenic impact remains detectable after AD.

386 **Potential bacterial host organisms of ARGs.** Correlation and network analysis  
387 have been used in previous studies to link ARGs to their potential host organisms (35–37,  
388 67). Here we used a combination of metagenomic assembly and binning methods to  
389 detect taxonomically annotated contigs and MAGs with ARGs.

390 Taxonomic annotation of ARG-containing contigs showed several connections  
391 between bacterial genera and ARGs. Among others, the genera *Enterobacter*, *Klebsiella*,  
392 *Acinetobacter* and *Pseudomonas* that include medically critical ESKAPE-pathogens were  
393 connected to ARGs in digester feed conferring resistance to multidrug, MLS, polymyxin,  
394 aminoglycoside, triclosan and bacitracin antibiotics. The high number of multidrug  
395 resistance genes is especially worrisome as these genes have the potential to confer

396 resistance to several types of antibiotics. Besides that, 12 out of 14 of the most abundant  
397 ARG-containing genera in digester feed also included resistance genes to polymyxin, a  
398 last-resort antibiotic used against Gram-negative bacteria. This highlights the spread of  
399 ARGs against last-resort antibiotics among various bacterial genera. ARG-containing  
400 genera that include clinically important species were also detected in digestion products,  
401 including *Burkholderia*, *Arcobacter*, *Streptococcus* and *Escherichia* indicating the risks  
402 associated with the possible use of anaerobic digestates.

403       Using metagenomic binning we were able to detect four ARG-containing MAGs  
404 originating from digester feed. A MAG annotated as *Erwinia* was found to carry 19  
405 ARGs conferring resistance to several classes of antibiotics. Although *Erwinia* is  
406 commonly known as a plant pathogen, few cases of human infections have also been  
407 reported (68, 69). As *Erwinia* is closely related to other *Enterobacteriaceae* that include  
408 several known human pathogens, horizontal transfer of ARGs from plant-pathogenic  
409 *Erwinia* to human pathogenic genera may occur. Additionally, MAGs annotated as lactic  
410 acid bacteria *Lactococcus lactis* and *Lactobacillus* were found to carry ARGs. These  
411 bacteria are extensively used for food fermentation processes and are often regarded as  
412 probiotics, however, increasing evidence suggests they are reservoirs of potentially  
413 transmissible ARGs and may play a crucial role in the acquisition of AMR via food (70).  
414 It is noteworthy, that although 75% of all MAGs originated from digestion products,  
415 these MAGs did not contain ARGs. This correlates with the low abundance of ARGs in  
416 digestion products detected by other methods used in this study.

417       **Methodological aspects of ARG detection.** In this study total community  
418 metagenome data and HT-qPCR data were used to characterize the diversity and

419 abundance of ARGs. While the metagenomic approach has the potential to detect higher  
420 diversity of ARGs due to large reference databases, qPCR of ARGs, although being  
421 limited in the number of ARGs even in high-throughput applications, can provide higher  
422 sensitivity (71). Our results showed that both metagenomic and HT-qPCR approach  
423 detected a broad spectrum of ARGs with higher diversity of ARGs in digester feed  
424 compared to digestion products. Among the limited number of ARGs detected in  
425 digestion products *mphA*, *lnuB*, *catQ* and *tet44* were found to be unique to digestate by  
426 both metagenomic and HT-qPCR approach. Additionally, HT-qPCR provided absolute  
427 abundance values for individual ARGs that could be related back to the number of gene  
428 copies present per gram of digester feed and in digested solids. This type of quantitative  
429 information on ARGs is required for assessing the risks associated with food waste and  
430 the use of anaerobic digestates as agricultural fertilizers. Thus, a combination of shotgun  
431 metagenomic and qPCR approach is recommended for a comprehensive view of a  
432 sample's resistome and for the assessment of AMR risks.

433         In addition to the annotation of short sequencing reads, we used assembled  
434 contigs to provide genomic context of ARGs. The distribution of ARG types on  
435 assembled contigs closely resembled that on short sequencing reads, additionally,  
436 assembled data provided information about genomic location and potential host  
437 organisms of ARGs, which cannot be determined from short sequencing reads. Although  
438 assembled contigs provide better resolution for taxonomic and functional annotation than  
439 short sequencing reads, assembly may also introduce biases (71). Similar problem has  
440 been noted for metagenomic binning, which often has limited power for analysis of  
441 complex microbial communities. This was also evident in the results of the current study

442 with 75% of MAGs (151 MAGs) originating from digestion products and only 25% of  
443 MAGs (50 MAGs) originating from the heterogeneous microbial communities of digester  
444 feed. Thus, our findings should be interpreted in light of the limitations of current  
445 methods used for taxonomic and functional analysis of complex microbial communities.

446 In conclusion, using a combination of metagenome sequencing, assembly and  
447 binning as well as quantitative PCR analysis is recommended to estimate the diversity  
448 and abundance of ARGs and to situate the ARGs within their genomic context and  
449 potential host organisms. The detection of potential host organisms and genomic context  
450 allows for a more accurate risk evaluation associated with solid organic wastes.

451

## 452 MATERIALS AND METHODS

453 **Anaerobic digestion system and feedstock.** A lab-scale anaerobic digestion  
454 system designed for the treatment of solid organic waste was operated for a total of 88  
455 weeks. System design, its operating parameters and feedstock have been described in  
456 detail by Guilford *et al.* (40). In short, the anaerobic digestion system consisted of 6 leach  
457 beds (8.5 L each), an upflow anaerobic sludge blanket reactor (UASB, 27.5 L) treating  
458 leach bed leachate, a UASB feed tank (17.5 L), a leach bed feed tank (17.5 L), three  
459 peristaltic pumps to recirculate leachate, two wet-tip gas meters for biogas measurement,  
460 and an automated control system. The system was maintained at 37–39°C with  
461 continuous recirculation of the leachate. It was operated in sequential batch feeding  
462 mode: each week one of the leach beds was filled with a mixture of lignocellulosic fibres  
463 and food waste (FW) making up the leach bed feed (LBF), recovered from local  
464 residential waste recycling programs. Lignocellulosic fibres included shredded cardboard,

465 boxboard, fine paper and newsprint; food waste was collected from a residential green  
466 bin program and sorted manually to remove bones and inorganic materials. Solids  
467 retention time in the system was six weeks.

468 **Sampling and DNA extraction.** Samples for microbial community analysis were  
469 collected during weeks 75–84 of the experiment, during which FW contributed 21.3% of  
470 the total COD in the feedstock and the system exhibited stable performance with a  
471 methane yield of 246 L-CH<sub>4</sub> kg-VS<sub>added</sub><sup>-1</sup> and a substrate destruction efficiency, as  
472 volatile solids (VS), of 63.5% (40). Ten 50 mL samples were collected: three food waste  
473 samples FW1, FW2, FW3 (FW source and composition has been described by Guilford  
474 *et al.* (40)); three leach bed feed samples LBF1, LBF2, LBF3 consisting of the respective  
475 food waste mixed with lignocellulosic fibres; three digestate samples DG74, DG76,  
476 DG78 collected after 6 weeks of digestion; and one sample from the microbial granular  
477 sludge of the UASB reactor (UASB). It should be noted that DG74, DG76 and DG78  
478 were not direct digestion products of LBF1, LBF2 and LBF3, respectively, although  
479 derived from the same source of FW and lignocellulosic fibres used for LBF1, LBF2 and  
480 LBF3. All samples were preserved at –20°C until DNA extraction.

481 Total community DNA was extracted using the PowerMax Soil DNA Isolation  
482 Kit (MoBio Laboratories, Carlsbad, CA, USA) from 5 g of sample according to  
483 manufacturer's protocol. FW and LBF samples were further purified with 5 M NaCl and  
484 100% ethanol as recommended by the manufacturer. The quantity and quality of DNA  
485 extracts was confirmed using NanoDrop spectrophotometer ND-1000 (Wilmington, DE,  
486 USA). All DNA extracts were stored at –80°C.

487           **Quantitative PCR analyses.** Quantitative PCR (qPCR) was used to quantify total  
488 bacterial (method 1.1 in Fig. 1) and archaeal (method 1.2 in Fig. 1) 16S rRNA gene  
489 copies using a CFX96 Touch Real-Time PCR Detection System (Bio-Rad Laboratories,  
490 Hercules, CA, USA) and previously published primers targeting most bacterial 16S  
491 rRNA genes: Bac1055f (5'-ATGGCTGTCGTCAGCT-3') and Bac1392r (5'-  
492 ACGGGCGGTGTGTAC-3') (72, 73), and most archaeal 16S rRNA genes: Arch787f  
493 (5'-ATTAGATACCCGBGTAGTCC-3') and Arch1059r (5'-GCCATGCACCCWCCTCT-  
494 3') (74). qPCR reactions were performed in 20  $\mu$ L comprising 10  $\mu$ L SsoFast EvaGreen  
495 Supermix (Bio-Rad Laboratories, Hercules, CA, USA), 0.5  $\mu$ M each forward and reverse  
496 primer, 2  $\mu$ L template DNA, and sterile UltraPure distilled water. The thermocycling  
497 program was as follows: initial denaturation at 98°C for 2 min, followed by 40 cycles of  
498 denaturation at 98°C for 5 s, annealing at  $T_m$  (55°C for bacterial 16S rRNA, 60°C for  
499 archaeal 16S rRNA) for 10 s, and final melting curve analysis in the range of 65–95°C  
500 (steps of 0.5°C for 5 s). All samples were measured in three technical replicates and  
501 every qPCR run included negative controls containing all reaction components except for  
502 template DNA. Serial dilutions of plasmid stocks containing corresponding 16S rRNA  
503 gene fragments were used to generate standard curves. Amplification data was analyzed  
504 using CFX Manager Software v.3.1. Copy numbers of bacterial and archaeal 16S rRNA  
505 genes per gram of sample dry weight were calculated as follows:  $AbsoluteAbundance =$   
506  $StartingQuantity * DNAElutionVolume / (SampleWeight * SampleDW)$  where  
507  $StartingQuantity$  represents the gene copies in 1  $\mu$ L DNA extract as estimated by the  
508 CFX Manager Software,  $DNAElutionVolume$  was 5000  $\mu$ L for DG74, DG76, DG78,  
509 UASB and 100  $\mu$ L for FW1, FW2, FW3, LBF1, LBF2, LBF3,  $SampleWeight$  was the

510 mass of the sample used for DNA extraction and SampleDW was the dry weight of the  
511 sample material used for DNA extraction.

512 A high-throughput qPCR (HT-qPCR) array was used for the quantification of  
513 ARGs (method 4.1 in Fig. 1) and MGEs (method 4.2 in Fig. 1) in FW1, FW2, DG74 and  
514 DG78. DNA extracts were sent to Dr Robert Stedtfeld at Michigan State University  
515 (USA) who performed the analysis. A total of 384 primer sets were used targeting 315  
516 ARGs and 57 MGEs, additionally taxonomic marker genes were included in the array  
517 (75). All HT-qPCR reactions were performed using Takara (previously WaferGen)  
518 SmartChip real-time PCR system as described previously (76). In brief, 5184 parallel  
519 qPCR reactions (100 nL) were dispensed into the SmartChip using the SmartChip  
520 Multisample Nanodispenser, followed by thermal cycling in the SmartChip Cycler,  
521 automatic melting process and initial data processing with SmartChip qPCR Software  
522 (v.2.7.0.1) as described before (76). Wells with multiple melt peaks and wells with  
523 amplification efficiency outside the range 1.75 to 2.25 were removed from analysis. Each  
524 sample was analyzed by three technical replicates. Genes detected in only one of the  
525 replicates were considered false positives and removed from analysis. Genomic copy  
526 numbers were estimated using the formula in Looft *et al.* (77) with the exception of  
527 setting detection limit to threshold cycle (Ct) 28 as suggested by Stedtfeld *et al.* (75).  
528 Relative abundances of the studied genes were calculated as ratios to 16S rRNA:  
529  $RelativeAbundance_{gene} = GenomicCopyNumber_{gene} / GenomicCopyNumber_{16S}$ . Absolute  
530 abundances were determined by multiplying the relative abundance of a gene by 16S  
531 rRNA absolute abundance (determined by regular qPCR analysis described above):  
532  $AbsoluteAbundance_{gene} = RelativeAbundance_{gene} * AbsoluteAbundance_{16S}$ . ARG



533 absolute abundances were visualized in R software using the package ComplexHeatmap  
534 (78).

535 **SSU rRNA gene amplicon sequencing and taxonomic analyses.** SSU rRNA

536 gene sequencing with the universal primers 926f-modified (5'-  
537 AACTYAAAKGAATWGRCGG-3') and 1392r-modified (5'-  
538 ACGGGCGGTGWGTRC-3') (modified from (79)) targeting the V6–V8 variable region  
539 of the 16S rRNA gene from bacteria and archaea as well as the 18S rRNA gene in  
540 eukarya was performed at McGill University and Génome Québec Innovation Centre  
541 (Canada) on Illumina MiSeq System (PE300). The analysis of sequencing reads was  
542 performed with QIIME1 package (tool 2.1 in Fig. 1) (80) by joining forward and reverse  
543 reads (multiple\_join\_paired\_ends.py, min overlap 50 bp, max mismatch allowance 8),  
544 removing low-quality sequences (multiple\_split\_libraries\_fastq.py, quality threshold 19),  
545 removing chimeric sequences and identifying operational taxonomic units at 97%  
546 similarity (identify\_chimeric\_seqs.py, pick\_open\_reference\_otus.py, method usearch61  
547 (81), reference database SILVA release 128).

548 **Total community metagenome sequencing and bioinformatic workflow.** Total

549 community metagenome sequencing of the samples FW1, FW2, LBF1, LBF2, DG74,  
550 DG78, UASB was performed at University of Toronto Centre for the Analysis of  
551 Genome Evolution and Function (Canada) on Illumina NextSeq500 Desktop Sequencer  
552 v2 using High Output flowcell (PE150). Bioinformatic workflow included quality control  
553 and trimming of the sequencing reads, taxonomic classification, metagenomic assembly  
554 and binning, and detection of ARGs. Sequence reads were trimmed with Trimmomatic  
555 v.0.32 (82) (tool 3.1 in Fig. 1) using default settings for paired-end mode, additional

556 trimming to remove polyG sequences ( $\geq 30$  bp) was performed with AfterQC v.0.9.1 (83)  
557 (tool 3.2 in Fig. 1).

558 Quality-trimmed reads were subjected to taxonomic classification using Kaiju  
559 v.1.4.5 (84) (tool 3.3 in Fig. 1) in greedy mode (allowed substitutions 5, minimum  
560 required match length 11, minimum required match score 70) with bacterial, archaeal,  
561 eukaryotic and viral protein sequences from the NCBI nr database as reference. To  
562 further investigate microbial community composition, metaxa2 v.2.1 (85) (tool 3.4 in Fig.  
563 1) was used to extract small subunit rRNA gene reads in metagenome mode with default  
564 search criteria and reliability score cut-off 80.

565 Quality-trimmed reads were assembled into longer DNA contigs using  
566 MEGAHIT v.1.1.1 (86) (tool 3.6 in Fig. 1) and metaSPAdes v.3.10.1 (87) (tool 3.7 in  
567 Fig. 1) with default settings. Assemblies were compared using metaQUAST v.4.5 (88)  
568 which also provided assembly statistics. Metagenome binning was performed using  
569 MaxBin v.2.2.3 (89) (tool 3.11 in Fig. 1) and MetaBAT v.2.12 (90) (tool 3.12 in Fig. 1)  
570 with default settings on the MEGAHIT assemblies. All genome bins produced by both  
571 binning methods were dereplicated using dRep v.1.4.3 (91) (tool 3.13 in Fig. 1) with  
572 default settings (ANI cut-off 99%, minimum genome completeness 75%, maximum  
573 contamination 25%) and evaluated with CheckM v.1.0.7 (92). Quality of the resulting  
574 metagenome-assembled genomes (MAGs) was defined as (Completeness –  
575 5\*Contamination) as suggested by Parks *et al.* (93). MAGs with quality  $>50$  and  
576 taxonomic classification to at least phylum level, were submitted to the JGI Integrated  
577 Microbial Genomes and Microbiomes (IMG) database for annotation. Anvi'o v.5 (94)  
578 was used for visualizing MAGs clustered based on the relative abundance of MAGs in

579 the samples: Euclidian distances were calculated from relative abundance estimates of  
580 each MAG and clustering was performed using the ward linkage algorithm. Relative  
581 abundance of each MAG was calculated as number of reads recruited to the MAG  
582 divided by total reads recruited to that MAG across all samples.

583         ARGs from subsets of quality-trimmed sequencing reads (20 million  
584 reads/sample) were determined with ARGs-OAP v.1.2 (41) (tool 3.5 in Fig. 1) using the  
585 default reference database SARG and default settings. The same reference database was  
586 also used to detect ARGs on assembled contigs by local BLASTp (evaluate 1e-7, identity  
587 percent 80, minimal alignment length 25) using protein coding genes annotated by JGI  
588 IMG/M 4 version (95) as query sequences (tool 3.10 in Fig. 1). Contigs with multiple  
589 ARGs were identified by a local python script that counted how many times a contig ID  
590 appeared in the list of contigs that carried ARGs (Method S1 in supplemental material).  
591 PlasFlow v.1.1 (65) with default settings was used to predict plasmid sequences from the  
592 contigs with ARGs (tool 3.8 in Fig. 1). Taxonomic classification of the non-plasmid  
593 contigs carrying ARGs was determined with Kaiju v.1.4.5 (84) in greedy mode  
594 (maximum mismatches allowed 5, minimal required match length 11, minimal required  
595 match score 70, filtering of query sequences containing low-complexity regions on) (tool  
596 3.9 in Fig. 1) using NCBI RefSeq reference database and visualized with Cytoscape  
597 v.3.6.1 (96) by selecting 10 most abundant ARGs from all genera above relative  
598 abundance of 1%. The presence of ARGs in MAGs was determined by a local python  
599 script comparing a list of ARG-carrying contigs to the list of contigs included in the  
600 MAG (tool 3.14 in Fig. 1, Method S2 in supplemental material).

601           **Accession numbers.** Sequencing data from SSU rRNA gene sequencing  
602 (accession numbers provided in Table S1 in supplemental material) and total community  
603 metagenome sequencing (accession numbers provided in Table S3 in supplemental  
604 material) is available on NCBI Sequence Read Archive under BioProject PRJNA501900,  
605 SRA study SRP167436, accession numbers SRX4965138–47 (SSU rRNA gene  
606 sequencing) and SRX4986160–6 (total community metagenome sequencing).  
607 Additionally, metagenome assemblies (accession numbers provided in Table S6 in  
608 supplemental material) and metagenome assembled genomes (accession numbers  
609 provided in Table S9 in supplemental material) have been deposited to the JGI Integrated  
610 Microbial Genomes and Microbiomes (<https://img.jgi.doe.gov/cgi-bin/m/main.cgi>).

611

## 612 ACKNOWLEDGEMENTS

613 This research was funded by the Natural Sciences and Engineering Research Council of  
614 Canada (Collaborative Research and Development Grant), and by Miller Waste Systems  
615 Inc. We would like to thank Dr. Robert Stedtfeld from Michigan State University for his  
616 help advising and running the high-throughput qPCR analysis.

617

618

619 REFERENCES

- 620 1. Pepper IL, Brooks JP, Gerba CP. 2018. Antibiotic Resistant Bacteria in Municipal  
621 Wastes: Is There Reason for Concern? *Environ Sci Technol* 52:3949–3959.
- 622 2. WHO. 2015. Global action plan on antimicrobial resistance. World Health  
623 Organization, Geneva, Switzerland.
- 624 3. O’Neill J. 2016. Tackling Drug-Resistant Infections Globally: Final Report and  
625 Recommendations. The Review on Antimicrobial Resistance. HM Government  
626 and Wellcome Trust.
- 627 4. Robinson TP, Bu DP, Carrique-Mas J, Fèvre EM, Gilbert M, Grace D, Hay SI,  
628 Jiwakanon J, Kakkar M, Kariuki S, Laxminarayan R, Lubroth J, Magnusson U,  
629 Thi Ngoc P, Van Boeckel TP, Woolhouse MEJ. 2016. Antibiotic resistance is the  
630 quintessential One Health issue. *Trans R Soc Trop Med Hyg* 110:377–80.
- 631 5. Bengtsson-Palme J, Kristiansson E, Larsson DGJ. 2018. Environmental factors  
632 influencing the development and spread of antibiotic resistance. *FEMS Microbiol*  
633 *Rev* 42.
- 634 6. Huijbers PMC, Blaak H, de Jong MCM, Graat EAM, Vandenbroucke-Grauls  
635 CMJE, de Roda Husman AM. 2015. Role of the Environment in the Transmission  
636 of Antimicrobial Resistance to Humans: A Review. *Environ Sci Technol*  
637 49:11993–12004.
- 638 7. D’Costa VM, King CE, Kalan L, Morar M, Sung WWL, Schwarz C, Froese D,  
639 Zazula G, Calmels F, Debruyne R, Golding GB, Poinar HN, Wright GD. 2011.  
640 Antibiotic resistance is ancient. *Nature* 477:457–61.
- 641 8. Durso LM, Wedin DA, Gilley JE, Miller DN, Marx DB. 2016. Assessment of

- 642 Selected Antibiotic Resistances in Ungrazed Native Nebraska Prairie Soils. *J*  
643 *Environ Qual* 45:454–462.
- 644 9. Perron GG, Whyte L, Turnbaugh PJ, Goordial J, Hanage WP, Dantas G, Desai  
645 MM. 2015. Functional Characterization of Bacteria Isolated from Ancient Arctic  
646 Soil Exposes Diverse Resistance Mechanisms to Modern Antibiotics. *PLoS One*  
647 10:e0069533.
- 648 10. Hatosy SM, Martiny AC. 2015. The ocean as a global reservoir of antibiotic  
649 resistance genes. *Appl Environ Microbiol* 81:7593–9.
- 650 11. Czekalski N, Sigdel R, Birtel J, Matthews B, Bürgmann H. 2015. Does human  
651 activity impact the natural antibiotic resistance background? Abundance of  
652 antibiotic resistance genes in 21 Swiss lakes. *Environ Int* 81:45–55.
- 653 12. Berendonk TU, Manaia CM, Merlin C, Fatta-Kassinos D, Cytryn E, Walsh F,  
654 Bürgmann H, Sørum H, Norström M, Pons M-N, Kreuzinger N, Huovinen P,  
655 Stefani S, Schwartz T, Kisand V, Baquero F, Martinez JL. 2015. Tackling  
656 antibiotic resistance: the environmental framework. *Nat Rev Microbiol* 13:310–7.
- 657 13. Braguglia CM, Gallipoli A, Gianico A, Pagliaccia P. 2018. Anaerobic  
658 bioconversion of food waste into energy: A critical review. *Bioresour Technol*  
659 248:37–56.
- 660 14. Hoornweg D, Bhada-Tata P. 2012. *What a Waste : A Global Review of Solid*  
661 *Waste Management*. World Bank, Washington, DC.
- 662 15. Friedman M. 2015. Antibiotic-Resistant Bacteria: Prevalence in Food and  
663 Inactivation by Food-Compatible Compounds and Plant Extracts. *J Agric Food*  
664 *Chem* 63:3805–3822.

- 665 16. Bengtsson-Palme J. 2017. Antibiotic resistance in the food supply chain: where  
666 can sequencing and metagenomics aid risk assessment? *Curr Opin Food Sci*  
667 14:66–71.
- 668 17. Chajęcka-Wierzchowska W, Zadernowska A, Łaniewska-Trokenheim Ł. 2016.  
669 Diversity of Antibiotic Resistance Genes in *Enterococcus* Strains Isolated from  
670 Ready-to-Eat Meat Products. *J Food Sci* 81:M2799–M2807.
- 671 18. Noyes NR, Yang X, Linke LM, Magnuson RJ, Dettenwanger A, Cook S,  
672 Geornaras I, Woerner DE, Gow SP, McAllister TA, Yang H, Ruiz J, Jones KL,  
673 Boucher CA, Morley PS, Belk KE. 2016. Resistome diversity in cattle and the  
674 environment decreases during beef production. *Elife* 5:e13195.
- 675 19. Yang X, Noyes NR, Doster E, Martin JN, Linke LM, Magnuson RJ, Yang H,  
676 Geornaras I, Woerner DR, Jones KL, Ruiz J, Boucher C, Morley PS, Belk KE.  
677 2016. Use of Metagenomic Shotgun Sequencing Technology To Detect Foodborne  
678 Pathogens within the Microbiome of the Beef Production Chain. *Appl Environ*  
679 *Microbiol* 82:2433–43.
- 680 20. Oliveira M, Viñas I, Usall J, Anguera M, Abadias M. 2012. Presence and survival  
681 of *Escherichia coli* O157:H7 on lettuce leaves and in soil treated with  
682 contaminated compost and irrigation water. *Int J Food Microbiol* 156:133–140.
- 683 21. Rahube TO, Marti R, Scott A, Tien Y-C, Murray R, Sabourin L, Zhang Y, Duenk  
684 P, Lapen DR, Topp E. 2014. Impact of fertilizing with raw or anaerobically  
685 digested sewage sludge on the abundance of antibiotic-resistant coliforms,  
686 antibiotic resistance genes, and pathogenic bacteria in soil and on vegetables at  
687 harvest. *Appl Environ Microbiol* 80:6898–907.

- 688 22. Holvoet K, Sampers I, Callens B, Dewulf J, Uyttendaele M. 2013. Moderate  
689 prevalence of antimicrobial resistance in *Escherichia coli* isolates from lettuce,  
690 irrigation water, and soil. *Appl Environ Microbiol* 79:6677–83.
- 691 23. Marti R, Scott A, Tien Y-C, Murray R, Sabourin L, Zhang Y, Topp E. 2013.  
692 Impact of Manure Fertilization on the Abundance of Antibiotic-Resistant Bacteria  
693 and Frequency of Detection of Antibiotic Resistance Genes in Soil and on  
694 Vegetables at Harvest. *Appl Environ Microbiol* 79:5701–5709.
- 695 24. Diarra MS, Delaquis P, Rempel H, Bach S, Harlton C, Aslam M, Pritchard J, Topp  
696 E. 2014. Antibiotic Resistance and Diversity of *Salmonella enterica* Serovars  
697 Associated with Broiler Chickens. *J Food Prot* 77:40–49.
- 698 25. Yang B, Cui Y, Shi C, Wang J, Xia X, Xi M, Wang X, Meng J, Alali WQ, Walls I,  
699 Doyle MP. 2014. Counts, Serotypes, and Antimicrobial Resistance of *Salmonella*  
700 Isolates on Retail Raw Poultry in the People’s Republic of China. *J Food Prot*  
701 77:894–902.
- 702 26. Elhadi N. 2014. Prevalence and antimicrobial resistance of *Salmonella* spp. in raw  
703 retail frozen imported freshwater fish to Eastern Province of Saudi Arabia. *Asian*  
704 *Pac J Trop Biomed* 4:234–238.
- 705 27. Moore JE, Huang J, Yu P, Ma C, Moore PJ, Millar BC, Goldsmith CE, Xu J. 2014.  
706 High diversity of bacterial pathogens and antibiotic resistance in salmonid fish  
707 farm pond water as determined by molecular identification employing 16S rDNA  
708 PCR, gene sequencing and total antibiotic susceptibility techniques. *Ecotoxicol*  
709 *Environ Saf* 108:281–286.
- 710 28. Silveira-Filho VM, Luz IS, Campos APF, Silva WM, Barros MPS, Medeiros ES,



- 711 Freitas MFL, Mota RA, Sena MJ, Leal-Balbino TC. 2014. Antibiotic Resistance  
712 and Molecular Analysis of *Staphylococcus aureus* Isolated from Cow's Milk and  
713 Dairy Products in Northeast Brazil. *J Food Prot* 77:583–591.
- 714 29. Lee J, Shin SG, Jang HM, Kim YB, Lee J, Kim YM. 2017. Characterization of  
715 antibiotic resistance genes in representative organic solid wastes: Food waste-  
716 recycling wastewater, manure, and sewage sludge. *Sci Total Environ* 579:1692–  
717 1698.
- 718 30. Vasco-Correa J, Khanal S, Manandhar A, Shah A. 2018. Anaerobic digestion for  
719 bioenergy production: Global status, environmental and techno-economic  
720 implications, and government policies. *Bioresour Technol* 247:1015–1026.
- 721 31. Youngquist CP, Mitchell SM, Cogger CG. 2016. Fate of Antibiotics and Antibiotic  
722 Resistance during Digestion and Composting: A Review. *J Environ Qual* 45:537.
- 723 32. Pu C, Liu H, Ding G, Sun Y, Yu X, Chen J, Ren J, Gong X. 2018. Impact of direct  
724 application of biogas slurry and residue in fields: In situ analysis of antibiotic  
725 resistance genes from pig manure to fields. *J Hazard Mater* 344:441–449.
- 726 33. Zhang J, Mao F, Loh K-C, Gin KY-H, Dai Y, Tong YW. 2018. Evaluating the  
727 effects of activated carbon on methane generation and the fate of antibiotic  
728 resistant genes and class I integrons during anaerobic digestion of solid organic  
729 wastes. *Bioresour Technol* 249:729–736.
- 730 34. Zhang J, Chen M, Sui Q, Wang R, Tong J, Wei Y. 2016. Fate of antibiotic  
731 resistance genes and its drivers during anaerobic co-digestion of food waste and  
732 sewage sludge based on microwave pretreatment. *Bioresour Technol* 217:28–36.
- 733 35. Luo G, Li B, Li L-G, Zhang T, Angelidaki I. 2017. Antibiotic Resistance Genes

- 734 and Correlations with Microbial Community and Metal Resistance Genes in Full-  
735 Scale Biogas Reactors As Revealed by Metagenomic Analysis. *Environ Sci*  
736 *Technol* 51:4069–4080.
- 737 36. Li B, Yang Y, Ma L, Ju F, Guo F, Tiedje JM, Zhang T. 2015. Metagenomic and  
738 network analysis reveal wide distribution and co-occurrence of environmental  
739 antibiotic resistance genes. *ISME J* 9:2490–2502.
- 740 37. Jang HM, Shin J, Choi S, Shin SG, Park KY, Cho J, Kim YM. 2017. Fate of  
741 antibiotic resistance genes in mesophilic and thermophilic anaerobic digestion of  
742 chemically enhanced primary treatment (CEPT) sludge. *Bioresour Technol*  
743 244:433–444.
- 744 38. Stokes HW, Gillings MR. 2011. Gene flow, mobile genetic elements and the  
745 recruitment of antibiotic resistance genes into Gram-negative pathogens. *FEMS*  
746 *Microbiol Rev* 35:790–819.
- 747 39. Guilford NGH. 2017. The Anaerobic Digestion of Organic Solid Wastes of  
748 Variable Composition. PhD Thesis. University of Toronto.
- 749 40. Guilford NGH, Lee HP, Kanger K, Meyer T, Edwards EA. 2019. Solid state  
750 anaerobic digestion of mixed organic waste: the synergistic effect of food waste  
751 addition on the destruction of paper and cardboard. *bioRxiv*  
752 <https://doi.org/10.1101/564203>.
- 753 41. Yang Y, Jiang X, Cai B, Ma L, Li B, Zhang A, Cole JR, Tiedje JM, Zhang T.  
754 2016. ARGs-OAP: Online Analysis Pipeline for Antibiotic Resistance Genes  
755 Detection from Metagenomic Data Using an Integrated Structured ARG-database.  
756 *Bioinformatics* 32:2346–2351.

- 757 42. Alonso A, Martínez JL. 2000. Cloning and characterization of SmeDEF, a novel  
758 multidrug efflux pump from *Stenotrophomonas maltophilia*. *Antimicrob Agents*  
759 *Chemother* 44:3079–86.
- 760 43. Li X-Z, Zhang L, Poole K. 2002. SmeC, an outer membrane multidrug efflux  
761 protein of *Stenotrophomonas maltophilia*. *Antimicrob Agents Chemother* 46:333–  
762 43.
- 763 44. Lee H. 2018. Characterization of the Microbial Community in a Sequentially Fed  
764 Anaerobic Digester Treating Solid Organic Waste. University of Toronto.
- 765 45. Miller JH, Novak JT, Knocke WR, Young K, Hong Y, Vikesland PJ, Hull MS,  
766 Pruden A. 2013. Effect of Silver Nanoparticles and Antibiotics on Antibiotic  
767 Resistance Genes in Anaerobic Digestion. *Water Environ Res* 85:411–421.
- 768 46. De Filippis F, Parente E, Ercolini D. 2018. Recent Past, Present, and Future of the  
769 Food Microbiome. *Annu Rev Food Sci Technol* 9:589–608.
- 770 47. Nieminen TT, Dalgaard P, Björkroth J. 2016. Volatile organic compounds and  
771 *Photobacterium phosphoreum* associated with spoilage of modified-atmosphere-  
772 packaged raw pork. *Int J Food Microbiol* 218:86–95.
- 773 48. Jääskeläinen E, Hultman J, Parshintsev J, Riekkola M-L, Björkroth J. 2016.  
774 Development of spoilage bacterial community and volatile compounds in chilled  
775 beef under vacuum or high oxygen atmospheres. *Int J Food Microbiol* 223:25–32.
- 776 49. Säde E, Penttinen K, Björkroth J, Hultman J. 2017. Exploring lot-to-lot variation  
777 in spoilage bacterial communities on commercial modified atmosphere packaged  
778 beef. *Food Microbiol* 62:147–152.
- 779 50. Ferrocino I, Greppi A, La Stora A, Rantsiou K, Ercolini D, Cocolin L. 2016.

- 780 Impact of Nisin-Activated Packaging on Microbiota of Beef Burgers during  
781 Storage. *Appl Environ Microbiol* 82:549–59.
- 782 51. Stoops J, Ruyters S, Busschaert P, Spaepen R, Verreth C, Claes J, Lievens B, Van  
783 Campenhout L. 2015. Bacterial community dynamics during cold storage of  
784 minced meat packaged under modified atmosphere and supplemented with  
785 different preservatives. *Food Microbiol* 48:192–199.
- 786 52. Fougy L, Desmonts M-H, Coeuret G, Fassel C, Hamon E, Hézard B, Champomier-  
787 Vergès M-C, Chaillou S. 2016. Reducing Salt in Raw Pork Sausages Increases  
788 Spoilage and Correlates with Reduced Bacterial Diversity. *Appl Environ*  
789 *Microbiol* 82:3928–3939.
- 790 53. Benson AK, David JRD, Gilbreth SE, Smith G, Nietfeldt J, Legge R, Kim J, Sinha  
791 R, Duncan CE, Ma J, Singh I. 2014. Microbial successions are associated with  
792 changes in chemical profiles of a model refrigerated fresh pork sausage during an  
793 80-day shelf life study. *Appl Environ Microbiol* 80:5178–94.
- 794 54. Jackson CR, Randolph KC, Osborn SL, Tyler HL. 2013. Culture dependent and  
795 independent analysis of bacterial communities associated with commercial salad  
796 leaf vegetables. *BMC Microbiol* 13:274.
- 797 55. Rice LB. 2008. Federal Funding for the Study of Antimicrobial Resistance in  
798 Nosocomial Pathogens: No ESKAPE. *J Infect Dis* 197:1079–1081.
- 799 56. Wang P, Wang H, Qiu Y, Ren L, Jiang B. 2018. Microbial characteristics in  
800 anaerobic digestion process of food waste for methane production—A review.  
801 *Bioresour Technol* 248:29–36.
- 802 57. Supaphol S, Jenkins SN, Intomo P, Waite IS, O'Donnell AG. 2011. Microbial

- 803 community dynamics in mesophilic anaerobic co-digestion of mixed waste.  
804 *Bioresour Technol* 102:4021–4027.
- 805 58. Lin J, Zuo J, Ji R, Chen X, Liu F, Wang K, Yang Y. 2012. Methanogenic  
806 community dynamics in anaerobic co-digestion of fruit and vegetable waste and  
807 food waste. *J Environ Sci* 24:1288–1294.
- 808 59. Yi J, Dong B, Xue Y, Li N, Gao P, Zhao Y, Dai L, Dai X. 2014. Microbial  
809 Community Dynamics in Batch High-Solid Anaerobic Digestion of Food Waste  
810 Under Mesophilic Conditions. *J Microbiol Biotechnol* 24:270–279.
- 811 60. Kim YM, Jang HM, Lee K, Chantrasakdakul P, Kim D, Park KY. 2015. Changes  
812 in bacterial and archaeal communities in anaerobic digesters treating different  
813 organic wastes. *Chemosphere* 141:134–137.
- 814 61. Peng X, Zhang S, Li L, Zhao X, Ma Y, Shi D. 2018. Long-term high-solids  
815 anaerobic digestion of food waste: Effects of ammonia on process performance  
816 and microbial community. *Bioresour Technol* 262:148–158.
- 817 62. Zhang J, Zhang L, Loh K-C, Dai Y, Tong YW. 2017. Enhanced anaerobic  
818 digestion of food waste by adding activated carbon: Fate of bacterial pathogens  
819 and antibiotic resistance genes. *Biochem Eng J* 128:19–25.
- 820 63. Forsberg KJ, Reyes A, Wang B, Selleck EM, Sommer MOA, Dantas G. 2012. The  
821 Shared Antibiotic Resistome of Soil Bacteria and Human Pathogens. *Science* (80-  
822 ) 337:1107–1111.
- 823 64. Nõlvak H, Truu M, Oopkaup K, Kanger K, Krustok I, Nehrenheim E, Truu J.  
824 2018. Reduction of antibiotic resistome and integron-integrase genes in laboratory-  
825 scale photobioreactors treating municipal wastewater. *Water Res* 142:363–372.

- 826 65. Krawczyk PS, Lipinski L, Dziembowski A. 2018. PlasFlow: predicting plasmid  
827 sequences in metagenomic data using genome signatures. *Nucleic Acids Res*  
828 46:e35.
- 829 66. Gillings MR, Gaze WH, Pruden A, Smalla K, Tiedje JM, Zhu Y-G. 2015. Using  
830 the class 1 integron-integrase gene as a proxy for anthropogenic pollution. *ISME J*  
831 9:1269–79.
- 832 67. Zhang J, Chen M, Sui Q, Wang R, Tong J, Wei Y. 2016. Fate of antibiotic  
833 resistance genes and its drivers during anaerobic co-digestion of food waste and  
834 sewage sludge based on microwave pretreatment. *Bioresour Technol* 217:28–36.
- 835 68. O’Hara CM, Steigerwalt AG, Hill BC, Miller JM, Brenner DJ. 1998. First report  
836 of a human isolate of *Erwinia persicinus*. *J Clin Microbiol* 36:248–50.
- 837 69. Shin SY, Song JH, Ko KS. 2008. First Report of Human Infection Due to *Erwinia*  
838 *tasmaniensis*-Like Organism. *Int J Infect Dis* 12:e329–e330.
- 839 70. Devirgiliis C, Zinno P, Perozzi G. 2013. Update on antibiotic resistance in  
840 foodborne *Lactobacillus* and *Lactococcus* species. *Front Microbiol* 4:301.
- 841 71. Ju F, Zhang T. 2015. Experimental Design and Bioinformatics Analysis for the  
842 Application of Metagenomics in Environmental Sciences and Biotechnology.  
843 *Environ Sci Technol* 49:12628–12640.
- 844 72. Amann RI, Ludwig W, Schleifer KH. 1995. Phylogenetic identification and in situ  
845 detection of individual microbial cells without cultivation. *Microbiol Mol Biol Rev*  
846 59.
- 847 73. Ferris MJ, Muyzer G, Ward DM. 1996. Denaturing gradient gel electrophoresis  
848 profiles of 16S rRNA-defined populations inhabiting a hot spring microbial mat

- 849 community. *Appl Environ Microbiol* 62:340–6.
- 850 74. Yu Y, Lee C, Kim J, Hwang S. 2005. Group-specific primer and probe sets to  
851 detect methanogenic communities using quantitative real-time polymerase chain  
852 reaction. *Biotechnol Bioeng* 89:670–679.
- 853 75. Stedtfeld RD, Guo X, Stedtfeld TM, Sheng H, Williams MR, Hauschild K,  
854 Gunturu S, Tift L, Wang F, Howe A, Chai B, Yin D, Cole JR, Tiedje JM,  
855 Hashsham SA. 2018. Primer set 2.0 for highly parallel qPCR array targeting  
856 antibiotic resistance genes and mobile genetic elements. *FEMS Microbiol Ecol*  
857 94:fiy130.
- 858 76. Wang F-H, Qiao M, Su J-Q, Chen Z, Zhou X, Zhu Y-G. 2014. High Throughput  
859 Profiling of Antibiotic Resistance Genes in Urban Park Soils with Reclaimed  
860 Water Irrigation. *Environ Sci Technol* 48:9079–9085.
- 861 77. Looft T, Johnson TA, Allen HK, Bayles DO, Alt DP, Stedtfeld RD, Sul WJ,  
862 Stedtfeld TM, Chai B, Cole JR, Hashsham SA, Tiedje JM, Stanton TB. 2012. In-  
863 feed antibiotic effects on the swine intestinal microbiome. *Proc Natl Acad Sci U S*  
864 *A* 109:1691–6.
- 865 78. Gu Z, Eils R, Schlesner M. 2016. Complex heatmaps reveal patterns and  
866 correlations in multidimensional genomic data. *Bioinformatics* 32:2847–2849.
- 867 79. Engelbrektson A, Kunin V, Wrighton KC, Zvenigorodsky N, Chen F, Ochman H,  
868 Hugenholtz P. 2010. Experimental factors affecting PCR-based estimates of  
869 microbial species richness and evenness. *ISME J* 4:642–647.
- 870 80. Caporaso JG, Kuczynski J, Stombaugh J, Bittinger K, Bushman FD, Costello EK,  
871 Fierer N, Peña AG, Goodrich JK, Gordon JI, Huttley GA, Kelley ST, Knights D,

- 872 Koenig JE, Ley RE, Lozupone CA, McDonald D, Muegge BD, Pirrung M, Reeder  
873 J, Sevinsky JR, Turnbaugh PJ, Walters WA, Widmann J, Yatsunenko T, Zaneveld  
874 J, Knight R. 2010. QIIME allows analysis of high-throughput community  
875 sequencing data. *Nat Methods* 7:335–336.
- 876 81. Edgar RC. 2010. Search and clustering orders of magnitude faster than BLAST.  
877 *Bioinformatics* 26:2460–2461.
- 878 82. Bolger AM, Lohse M, Usadel B. 2014. Trimmomatic: a flexible trimmer for  
879 Illumina sequence data. *Bioinformatics* 30:2114–20.
- 880 83. Chen S, Huang T, Zhou Y, Han Y, Xu M, Gu J. 2017. AfterQC: automatic  
881 filtering, trimming, error removing and quality control for fastq data. *BMC*  
882 *Bioinformatics* 18:80.
- 883 84. Menzel P, Ng KL, Krogh A. 2016. Fast and sensitive taxonomic classification for  
884 metagenomics with Kaiju. *Nat Commun* 7:11257.
- 885 85. Bengtsson-Palme J, Hartmann M, Eriksson KM, Pal C, Thorell K, Larsson DGJ,  
886 Nilsson RH. 2015. metaxa 2: improved identification and taxonomic classification  
887 of small and large subunit rRNA in metagenomic data. *Mol Ecol Resour* 15:1403–  
888 1414.
- 889 86. Li D, Luo R, Liu C-M, Leung C-M, Ting H-F, Sadakane K, Yamashita H, Lam T-  
890 W. 2016. MEGAHIT v1.0: A fast and scalable metagenome assembler driven by  
891 advanced methodologies and community practices. *Methods* 102:3–11.
- 892 87. Nurk S, Meleshko D, Korobeynikov A, Pevzner PA. 2017. metaSPAdes: a new  
893 versatile metagenomic assembler. *Genome Res* 27(5):824–834.
- 894 88. Mikheenko A, Saveliev V, Gurevich A. 2016. MetaQUAST: evaluation of



- 895 metagenome assemblies. *Bioinformatics* 32:1088–1090.
- 896 89. Wu Y-W, Simmons BA, Singer SW. 2016. MaxBin 2.0: an automated binning  
897 algorithm to recover genomes from multiple metagenomic datasets. *Bioinformatics*  
898 32:605–607.
- 899 90. Kang DD, Froula J, Egan R, Wang Z. 2015. MetaBAT, an efficient tool for  
900 accurately reconstructing single genomes from complex microbial communities.  
901 *PeerJ* 3:e1165.
- 902 91. Olm MR, Brown CT, Brooks B, Banfield JF. 2017. dRep: a tool for fast and  
903 accurate genomic comparisons that enables improved genome recovery from  
904 metagenomes through de-replication. *ISME J* 11:2864–2868.
- 905 92. Parks DH, Imelfort M, Skennerton CT, Hugenholtz P, Tyson GW. 2015. CheckM:  
906 assessing the quality of microbial genomes recovered from isolates, single cells,  
907 and metagenomes. *Genome Res* 25:1043–55.
- 908 93. Parks DH, Rinke C, Chuvochina M, Chaumeil P-A, Woodcroft BJ, Evans PN,  
909 Hugenholtz P, Tyson GW. 2017. Recovery of nearly 8,000 metagenome-  
910 assembled genomes substantially expands the tree of life. *Nat Microbiol* 2:1533–  
911 1542.
- 912 94. Eren AM, Esen ÖC, Quince C, Vineis JH, Morrison HG, Sogin ML, Delmont TO.  
913 2015. Anvi'o: an advanced analysis and visualization platform for 'omics data.  
914 *PeerJ* 3:e1319.
- 915 95. Markowitz VM, Chen I-MA, Chu K, Szeto E, Palaniappan K, Pillay M, Ratner A,  
916 Huang J, Pagani I, Tringe S, Huntemann M, Billis K, Varghese N, Tennessen K,  
917 Mavromatis K, Pati A, Ivanova NN, Kyrpides NC. 2014. IMG/M 4 version of the

918 integrated metagenome comparative analysis system. *Nucleic Acids Res* 42:D568–  
919 D573.

920 96. Shannon P, Markiel A, Ozier O, Baliga NS, Wang JT, Ramage D, Amin N,  
921 Schwikowski B, Ideker T. 2003. Cytoscape: a software environment for integrated  
922 models of biomolecular interaction networks. *Genome Res* 13:2498–504.

923

924

925 TABLES

926 **TABLE 1** Genomic location of antibiotic resistance genes (ARGs) detected in total  
927 community metagenome sequencing data assembled with MEGAHIT. ARGs were  
928 detected by BLAST analysis of protein coding genes using local SARG reference  
929 database. Plasmid or chromosomal location of the ARGs was predicted by PlasFlow. All  
930 ARG BLAST hits detected in MEGAHIT-assembled metagenome sequencing data are  
931 provided in Table S7 in supplemental material.

932

| Sample | Total assembly length (bp) | Protein coding genes | Number of ARG BLAST hits (% from protein coding genes) | Plasmid ARGs (%) | Chromosomal ARGs (%) |
|--------|----------------------------|----------------------|--------------------------------------------------------|------------------|----------------------|
| FW1    | 1 285 684 727              | 2 088 107            | 2 407 (0.12%)                                          | 30.2             | 28.6                 |
| FW2    | 941 870 975                | 1 796 492            | 2 484 (0.14%)                                          | 34.7             | 23.0                 |
| LBF1   | 120 537 563                | 1 821 640            | 1 908 (0.10%)                                          | 30.0             | 28.9                 |
| LBF2   | 1 044 915 087              | 1 906 512            | 1 938 (0.10%)                                          | 33.2             | 21.9                 |
| DG74   | 726 434 840                | 1 137 099            | 11 (0.001%)                                            | 36.4             | 9.1                  |
| DG78   | 729 045 788                | 1 138 132            | 24 (0.002%)                                            | 33.3             | 8.3                  |
| UASB   | 941 623 397                | 1 636 065            | 20 (0.001%)                                            | 60.0             | 10.0                 |

933

934 **TABLE 2** Bacterial host organisms of non-plasmid ARGs detected in digestion products  
 935 (DG74, DG78, UASB). ARGs were identified on MEGAHIT-assembled contigs by  
 936 BLAST analysis of protein coding genes using local SARG reference database (Table S7  
 937 in supplemental material). Non-plasmid contigs carrying ARGs were further annotated  
 938 for their taxonomic affiliation using Kaiju.  
 939

| Kingdom/Phylum/Class         | Family/Genus                 | ARG              | ARG type       |
|------------------------------|------------------------------|------------------|----------------|
| <i>Firmicutes</i>            | not determined               | <i>ANT(6)-Ia</i> | aminoglycoside |
| <i>Terrabacteria group</i>   | not determined               | <i>ANT(9)-Ia</i> | aminoglycoside |
| <i>Bacteroidetes</i>         | <i>Proteiniphilum</i>        | <i>bacA</i>      | bacitracin     |
| <i>Betaproteobacteria</i>    | <i>Thauera</i>               | <i>bacA</i>      | bacitracin     |
| <i>Deltaproteobacteria</i>   | <i>Desulfomicrobium</i>      | <i>bacA</i>      | bacitracin     |
| <i>Firmicutes</i>            | <i>Alkaliphilus</i>          | <i>bacA</i>      | bacitracin     |
| <i>Firmicutes</i>            | <i>Thermoanaerobacterium</i> | <i>bcrA</i>      | bacitracin     |
| <i>Kiritimatiellaeota</i>    | <i>Kiritimatiella</i>        | <i>OXA-119</i>   | beta-lactam    |
| <i>Betaproteobacteria</i>    | <i>Burkholderia</i>          | <i>katG</i>      | isoniazid      |
| <i>Epsilonproteobacteria</i> | <i>Arcobacter</i>            | <i>katG</i>      | isoniazid      |
| <i>Bacteroidetes</i>         | <i>Fermentimonas</i>         | <i>ermF</i>      | MLS            |
| <i>Firmicutes</i>            | not determined               | <i>linB</i>      | MLS            |
| <i>Deltaproteobacteria</i>   | <i>Desulfococcus</i>         | <i>lnuF</i>      | MLS            |
| <i>Deltaproteobacteria</i>   | <i>Geobacter</i>             | <i>lnuF</i>      | MLS            |
| <i>Firmicutes</i>            | <i>Streptococcus</i>         | <i>mefA</i>      | MLS            |
| <i>Gammaproteobacteria</i>   | <i>Escherichia</i>           | <i>mefB*</i>     | MLS            |
| <i>Firmicutes</i>            | <i>Clostridium</i>           | <i>mel</i>       | MLS            |
| <i>Firmicutes</i>            | <i>Desulfitobacterium</i>    | <i>vatB</i>      | MLS            |
| <i>Betaproteobacteria</i>    | <i>Thauera</i>               | <i>acrB</i>      | multidrug      |
| <i>Deltaproteobacteria</i>   | <i>Desulfobacca</i>          | <i>acrB</i>      | multidrug      |
| <i>Deltaproteobacteria</i>   | <i>Syntrophobacter</i>       | <i>acrB*</i>     | multidrug      |
| <i>Planctomycetes</i>        | <i>Thermogutta</i>           | <i>acrB</i>      | multidrug      |
| <i>Firmicutes</i>            | not determined               | <i>lsaE</i>      | multidrug      |
| <i>Deltaproteobacteria</i>   | <i>Desulfobacca</i>          | <i>smeE</i>      | multidrug      |
| <i>Gammaproteobacteria</i>   | <i>Sedimenticola</i>         | <i>smeR</i>      | multidrug      |
| <i>Betaproteobacteria</i>    | <i>Roseateles</i>            | <i>arnA</i>      | polymyxin      |
| <i>Gammaproteobacteria</i>   | <i>Enterobacteriaceae</i>    | <i>arnA</i>      | polymyxin      |
| <i>Bacteria</i>              | not determined               | <i>sulI</i>      | sulfonamide    |
| <i>Bacteria</i>              | not determined               | <i>sulI</i>      | sulfonamide    |

940 \* ARG was affiliated to the respective genus on several contigs

941

942 **TABLE 3** Metagenome assembled genomes (MAGs) containing antibiotic resistance genes (ARGs) originating from digester feed  
 943 (FW1, FW2, LBF1, LBF2). ARGs were not detected in MAGs from digestion products. MAGs were produced by MaxBin and  
 944 metaBAT, dereplicated with dRep and evaluated with CheckM for genome size, GC%, completeness, contamination and estimated  
 945 quality. ARGs that were detected in two separate copies in a given MAG are indicated by parenthesis (2x). All ARG-containing  
 946 MAGs have been deposited to the JGI Integrated Microbial Genomes and Microbiomes (IMG/M). Additional information about all  
 947 MAGs is available in Table S9 and Figure S4 in supplemental material.

948

| MAG            | IMG/M ID   | Genome size (bp) | GC%  | Completeness (%) | Contamination (%) | Estimated quality | ARG              | ARG type       |
|----------------|------------|------------------|------|------------------|-------------------|-------------------|------------------|----------------|
| <i>Erwinia</i> | 2772190821 | 5 042 753        | 56.0 | 97.9             | 1.9               | 88.2              | <i>acrD</i>      | aminoglycoside |
|                |            |                  |      |                  |                   |                   | <i>bacA</i>      | bacitracin     |
|                |            |                  |      |                  |                   |                   | <i>acrB</i>      | multidrug      |
|                |            |                  |      |                  |                   |                   | <i>cpxA</i>      | multidrug      |
|                |            |                  |      |                  |                   |                   | <i>cpxR</i> (2x) | multidrug      |
|                |            |                  |      |                  |                   |                   | <i>CRP</i>       | multidrug      |
|                |            |                  |      |                  |                   |                   | <i>emrR</i>      | multidrug      |
|                |            |                  |      |                  |                   |                   | <i>H-NS</i>      | multidrug      |
|                |            |                  |      |                  |                   |                   | <i>mdtB</i> (2x) | multidrug      |
|                |            |                  |      |                  |                   |                   | <i>mdtC</i>      | multidrug      |
|                |            |                  |      |                  |                   |                   | <i>arnA</i>      | polymyxin      |
|                |            |                  |      |                  |                   |                   | <i>phoP</i>      | polymyxin      |
|                |            |                  |      |                  |                   |                   | <i>pmrF</i>      | polymyxin      |
| <i>rosA</i>    | polymyxin  |                  |      |                  |                   |                   |                  |                |

|                           |            |           |      |      |     |      |             |              |
|---------------------------|------------|-----------|------|------|-----|------|-------------|--------------|
| <i>Lactococcus lactis</i> | 2773857626 | 3 416 378 | 33.7 | 92.0 | 5.7 | 63.4 | <i>rosB</i> | polymyxin    |
|                           |            |           |      |      |     |      | <i>emrB</i> | quinolone    |
|                           |            |           |      |      |     |      | <i>folP</i> | sulfonamide  |
|                           |            |           |      |      |     |      | <i>lmrC</i> | MLS          |
|                           |            |           |      |      |     |      | <i>lmrD</i> | MLS          |
|                           |            |           |      |      |     |      | <i>lmrP</i> | multidrug    |
|                           |            |           |      |      |     |      | <i>tetM</i> | tetracycline |
|                           |            |           |      |      |     |      | <i>tetS</i> | tetracycline |
| <i>Lactobacillus</i>      | 2772190822 | 2 569 052 | 30.9 | 97.0 | 3.6 | 79.1 | <i>dfrE</i> | trimethoprim |
| <i>Bifidobacteriaceae</i> | 2806310579 | 2 067 166 | 64.6 | 90.7 | 2.4 | 78.6 | <i>mdsB</i> | multidrug    |

949

950 FIGURES

951

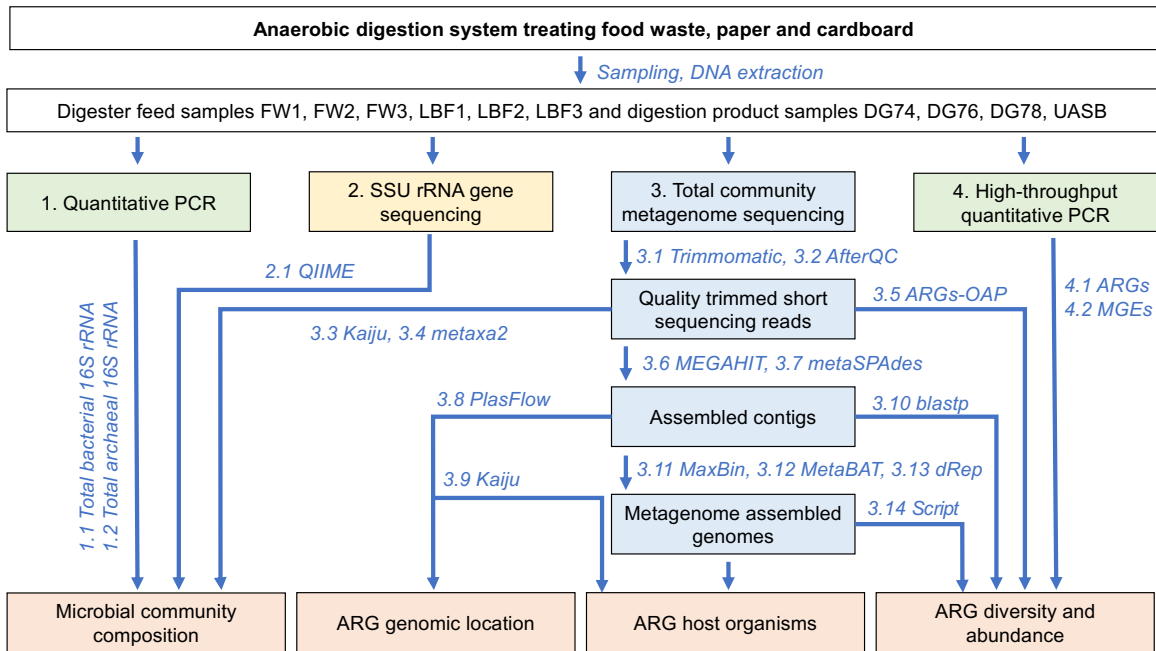

952

953 **FIG 1** Experimental workflow of anaerobic digestion experiment. Total community  
 954 DNA extracts from 10 samples including food waste (FW1, FW2, FW3), leach bed feed  
 955 (LBF1, LBF2, LBF3), digestate (DG74, DG76, DG78) and microbial granules from  
 956 UASB reactor (UASB) were subjected to small subunit (SSU) rRNA gene amplicon  
 957 sequencing (2), total community metagenome sequencing (3) and quantitative PCR  
 958 analysis (1, 4). Sequencing data was analyzed using a variety of bioinformatic tools  
 959 shown and numbered in italics. SSU rRNA gene sequencing data was analyzed using  
 960 QIIME1 (tool 2.1). The workflow for total community metagenome sequencing data  
 961 included quality trimming of the short sequencing reads (tools 3.1 and 3.2), taxonomic  
 962 annotation of the quality trimmed reads (tools 3.3 and 3.4), detection of ARGs from  
 963 quality trimmed reads (tool 3.5), assembly of the quality trimmed reads into contigs  
 964 (tools 3.6 and 3.7), identification of plasmid sequences (tool 3.8) and ARGs (tool 3.10)

965 from assembled contigs, taxonomic annotation of assembled contigs (tool 3.9), binning of  
966 the assembled contigs into metagenome assembled genomes (tools 3.11, 3.12, 3.13) and  
967 detection of ARGs in metagenome assembled genomes by a local Python script (tool  
968 3.14). Quantitative PCR was performed for bacterial (1.1) and archaeal (1.2) 16S rRNA  
969 gene as well as for ARGs (4.1) and MGEs (4.2) using a high-throughput qPCR array.  
970 Results covered microbial community composition, ARG diversity, abundance, genomic  
971 location and potential bacterial host organisms of ARGs.  
972



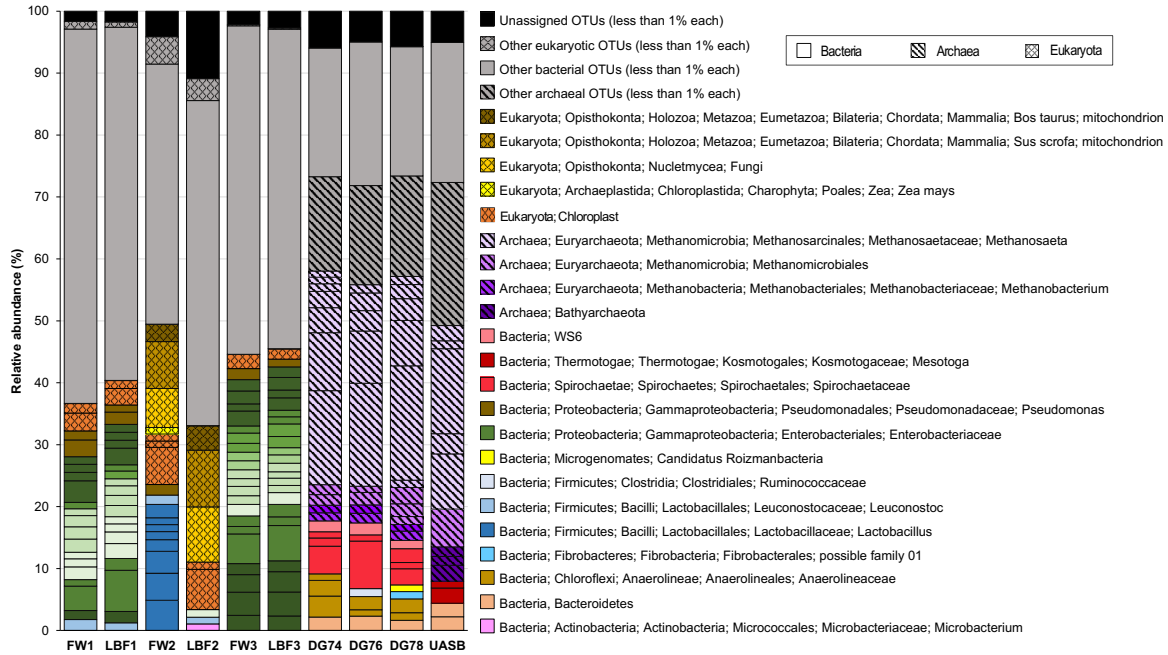

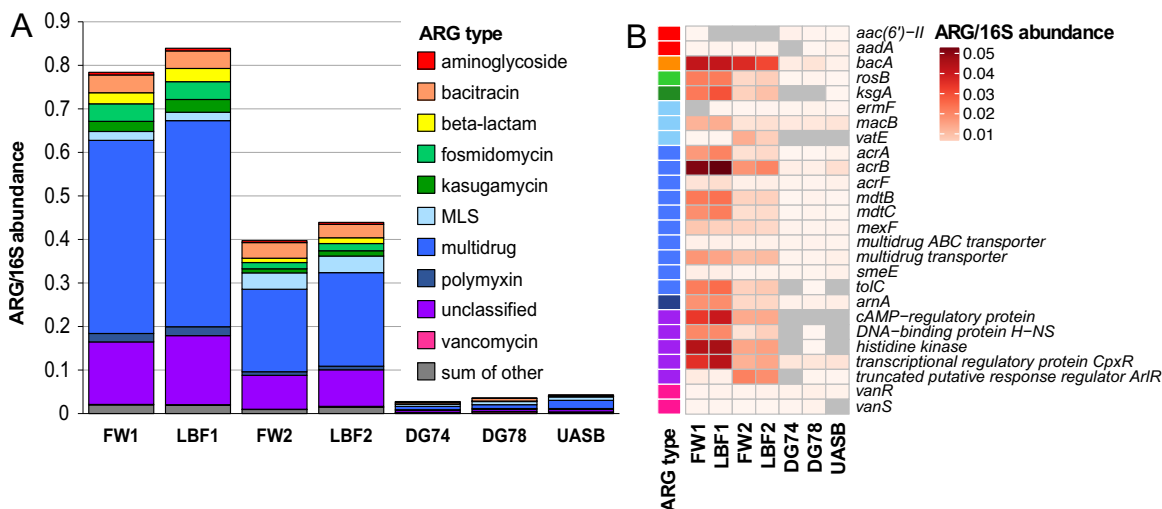

983

984 **FIG 3** Relative abundance of ARGs per 16S rRNA gene categorized by type (A) and by

985 gene (B) detected in total community metagenome sequencing reads using ARGs-OAP.

986 The ten most abundant ARGs from each sample are depicted in panel B. Genes not

987 detected are marked in grey. Relative abundances of all detected ARGs are provided in

988 Table S4 in supplemental material.

989

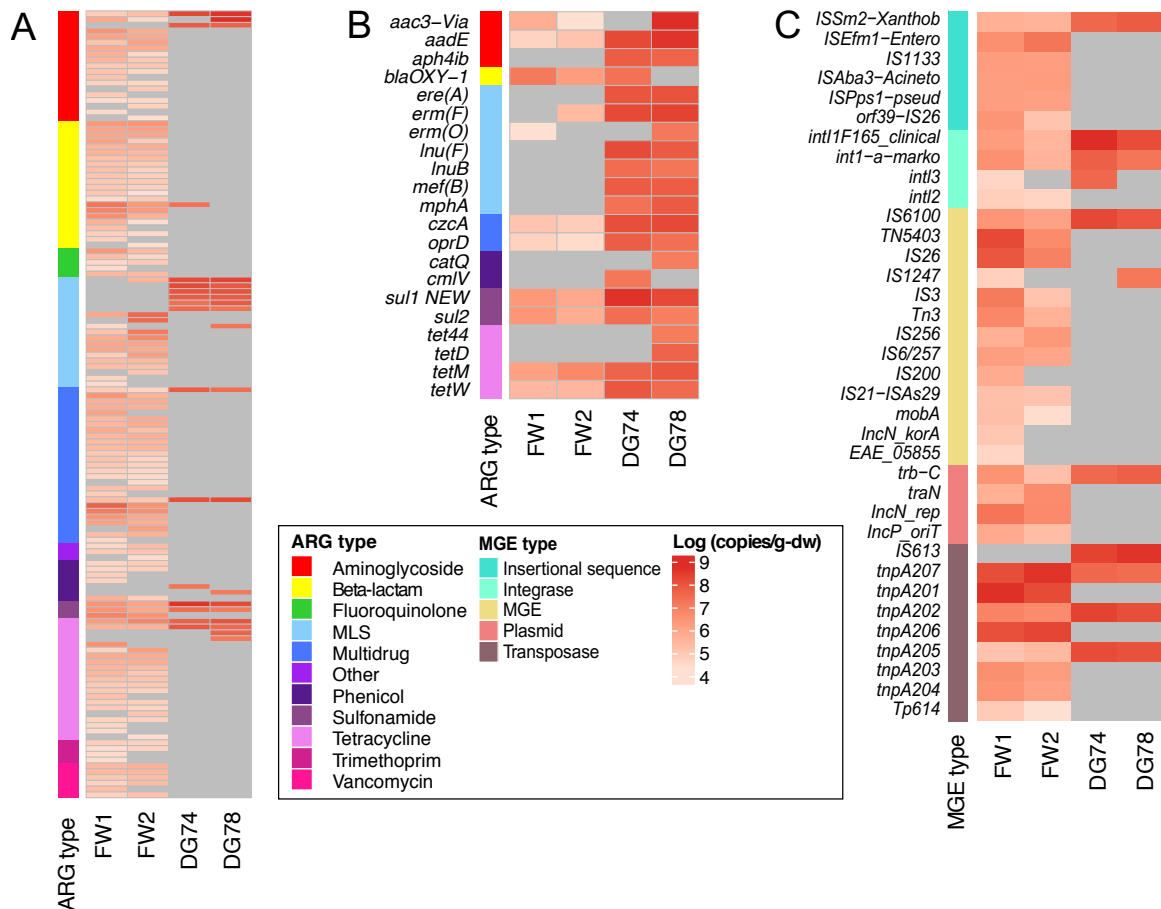

990

991 **FIG 4** Absolute abundance of ARGs and MGEs in food waste (FW1, FW2) and digestate

992 (DG74, DG78) samples detected using a high-throughput qPCR array. Absolute

993 abundance of all detected genes is presented on log-scale as gene copies per gram of dry

994 weight of food waste or digestate samples. Genes not detected are marked in grey. Panel

995 A shows all ARGs detected in at least one of the four samples. Panel B shows all ARGs

996 detected in at least one of the digestate samples. Panel C shows all MGEs detected in at

997 least one of the four samples. Raw data for all analyzed genes together with abundance

998 calculations are provided in Table S5 in supplemental material.

999

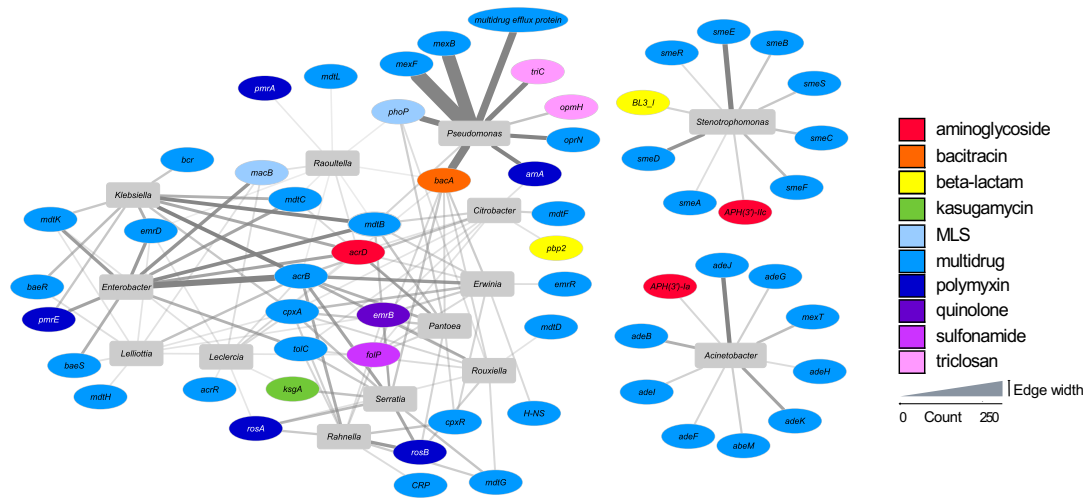

1000

1001 **FIG 5** Most abundant bacterial host genera of non-plasmid ARGs detected in digester  
 1002 feed (FW1, FW2, LBF1, LBF2). ARGs were identified on MEGAHIT-assembled contigs  
 1003 by BLAST analysis of protein coding genes using local SARG reference database (Table  
 1004 S7 in supplemental material). Non-plasmid contigs carrying ARGs were further  
 1005 annotated for their taxonomic affiliation using Kaiju. ARGs are depicted in ellipses  
 1006 colored by resistance type and bacterial genera are depicted in grey rectangles. The width  
 1007 of the connecting edge corresponds to detection frequency of individual host-ARG pairs.
